# Supplementary material for: Effects of Resistance Exercise on Slow-Twitch Soleus Muscle of Infarcted Rats
Source: MDPI journal article supplement (doi:10.3390/antiox12020291), 2023-01-27
Supplement: s1 [file s1]

## Supplementary data

**Table S1.** Maximum carrying load capacity evaluated before exercise, after 45 days, and at the end of the experimental period

|                    | Sham      | MI        | R-MI        |
|--------------------|-----------|-----------|-------------|
| <b>Initial (g)</b> | 416 ± 90  | 281 ± 70* | 342 ± 86    |
| <b>45 days (g)</b> | -         | -         | 470 ± 148   |
| <b>Final (g)</b>   | 306 ± 144 | 349 ± 143 | 617 ± 169*# |

MI: myocardial infarction; R-MI: resistance exercised MI. ANOVA and Bonferroni; \* p<0.05 vs Sham; # p<0.05 vs MI.

**Table S2.** Echocardiographic data before the exercise protocol

|                                  | Sham             | MI                 | R-MI               |
|----------------------------------|------------------|--------------------|--------------------|
| <b>LVSD (mm)</b>                 | 4.10 (3.81-4.30) | 8.16 (7.99-8.62) * | 7.89 (7.23-8.55) * |
| <b>LVDD (mm)</b>                 | 7.97 (7.70-8.58) | 10.4 (10.0-10.9) * | 9.79 (9.63-10.4) * |
| <b>Left atrium diameter (mm)</b> | 5.29 (5.11-5.66) | 7.66 (6.70-8.27) * | 6.75 (6.27-7.41) * |
| <b>FAC (%)</b>                   | 65.7 ± 5.52      | 40.9 ± 10.3 *      | 37.2 ± 9.13 *      |
| <b>PWSV (mm/s)</b>               | 40.5 ± 5.58      | 24.5 ± 7.67 *      | 28.6 ± 8.37 *      |
| <b>EF</b>                        | 0.86 (0.84-0.89) | 0.51 (0.43-0.57) * | 0.50 (0.42-0.58) * |

MI: myocardial infarction; R-MI: resistance exercised MI; LVSD and LVDD: left ventricle (LV) systolic and diastolic diameters, respectively; FAC: fractional area change; PWSV: LV posterior wall shortening velocity; EF: ejection fraction. ANOVA and Bonferroni or Kruskal-Wallis e Dunn; \* p<0.05 vs Sham.
